# Supplementary material for: Profiling the Physical Performance of Young Boxers with Unsupervised Machine Learning: A Cross-Sectional Study
Source: MDPI journal article supplement (doi:10.3390/sports11070131), 2023-07-07
Supplement: s1 [file s1]

**Table 1.** Means, standard deviations, and correlations with confidence intervals

| Variable       | <i>M</i> | <i>SD</i> | 1                      | 2                   | 3                      | 4                      | 5                      | 6                   | 7                   | 8                   | 9                  |
|----------------|----------|-----------|------------------------|---------------------|------------------------|------------------------|------------------------|---------------------|---------------------|---------------------|--------------------|
| 1. Sex         | 1.19     | 0.40      |                        |                     |                        |                        |                        |                     |                     |                     |                    |
| 2. Age         | 15.28    | 0.91      | -.09<br>[-.22, .04]    |                     |                        |                        |                        |                     |                     |                     |                    |
| 3. BM          | 63.41    | 15.45     | -.19**<br>[-.31, -.06] | .08<br>[-.05, .21]  |                        |                        |                        |                     |                     |                     |                    |
| 4. CMJ Height  | 28.19    | 6.80      | -.40**<br>[-.51, -.29] | .18**<br>[.05, .30] | -.35**<br>[-.46, -.23] |                        |                        |                     |                     |                     |                    |
| 5. Handgrip    | 33.45    | 7.65      | -.45**<br>[-.55, -.34] | .27**<br>[.15, .39] | .34**<br>[.22, .45]    | .37**<br>[.26, .48]    |                        |                     |                     |                     |                    |
| 6. Punch Force | 56.73    | 18.87     | -.08<br>[-.21, .05]    | .13<br>[-.00, .25]  | -.10<br>[-.23, .03]    | .08<br>[-.05, .21]     | .06<br>[-.07, .19]     |                     |                     |                     |                    |
| 7. PF/BM       | 0.95     | 0.38      | .04<br>[-.09, .17]     | .08<br>[-.05, .21]  | -.55**<br>[-.63, -.45] | .23**<br>[.11, .35]    | -.13*<br>[-.26, -.00]  | .85**<br>[.81, .89] |                     |                     |                    |
| 8. PF/HG       | 1.78     | 0.70      | .22**<br>[.10, .34]    | -.04<br>[-.17, .09] | -.26**<br>[-.38, -.14] | -.17**<br>[-.30, -.05] | -.51**<br>[-.60, -.41] | .79**<br>[.74, .84] | .79**<br>[.73, .83] |                     |                    |
| 9. PF/(BM+HG)  | 0.61     | 0.23      | .11<br>[-.02, .23]     | .05<br>[-.08, .18]  | -.48**<br>[-.58, -.38] | .10<br>[-.03, .23]     | -.27**<br>[-.38, -.14] | .88**<br>[.84, .90] | .98**<br>[.97, .98] | .89**<br>[.87, .92] |                    |
| 10. PV         | 8.64     | 2.64      | -.08<br>[-.21, .05]    | .07<br>[-.06, .20]  | -.09<br>[-.22, .04]    | .17*<br>[.04, .29]     | .11<br>[-.02, .24]     | .11<br>[-.02, .24]  | .15*<br>[.02, .27]  | .04<br>[-.09, .17]  | .12<br>[-.01, .24] |

*Note.*  $M$  and  $SD$  are used to represent mean and standard deviation, respectively. Values in square brackets indicate the 95% confidence interval for each correlation. The confidence interval is a plausible range of population correlations that could have caused the sample correlation (Cumming, 2014). \* indicates  $p < .05$ . \*\* indicates  $p < .01$ .
